# Supplementary material for: Insights into chirality distributions of single-walled carbon nanotubes grown on different CoxMg1−xO solid solutions
Source: Royal Society of Chemistry journal article supplement (doi:10.1039/c3ta15325h), 2014-01-01
Supplement: c3ta15325h2.pdf [file c3ta15325h2.pdf]

## Supporting Information

### Insights into Chirality Distributions of Single-Walled Carbon Nanotube Grown on Different $\text{Co}_x\text{Mg}_{1-x}\text{O}$ Solid Solutions

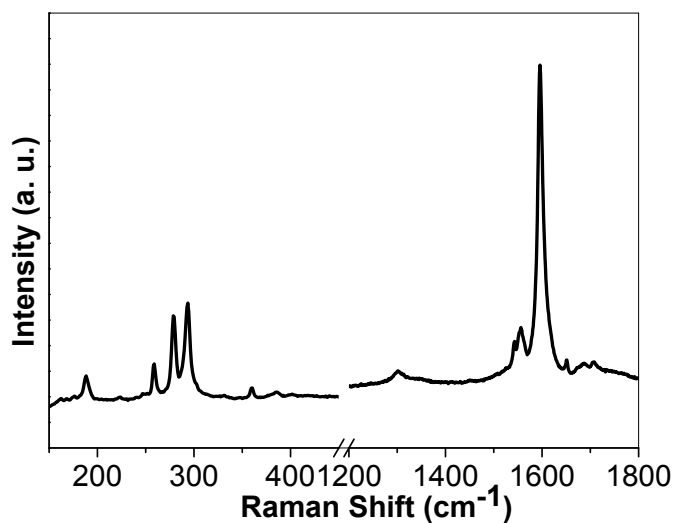

**Figure S1.** Raman spectrum of SWNTs grown on ALD- $\text{Co}_x\text{Mg}_{1-x}\text{O}$  solid solution at 600 °C using CO as the carbon source.

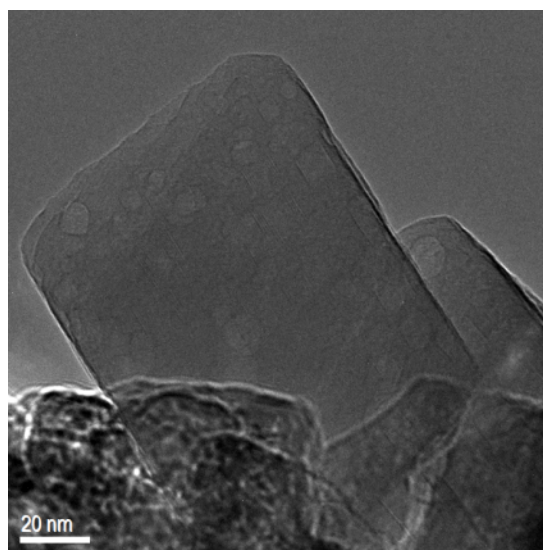

**Figure S2.** TEM image of ALD- $\text{Co}_x\text{Mg}_{1-x}\text{O}$ , showing no Co nanoparticle on the surface of the raw catalyst.

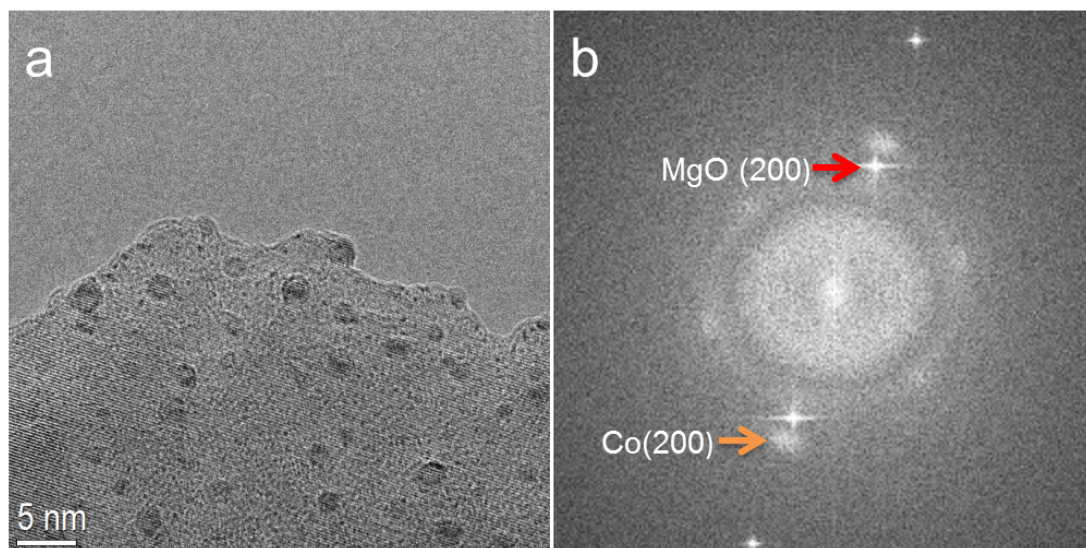

**Figure S3.** (a) *In situ* TEM image of formed upon reduction of impregnation prepared  $\text{Co}_x\text{Mg}_{1-x}\text{O}(1000)$  catalyst at 600 °C in the presence of 6.3 mbar CO. (b) Fast Fourier transform pattern of figure a, showing the epitaxial relationship between Co nanoparticles and MgO support.

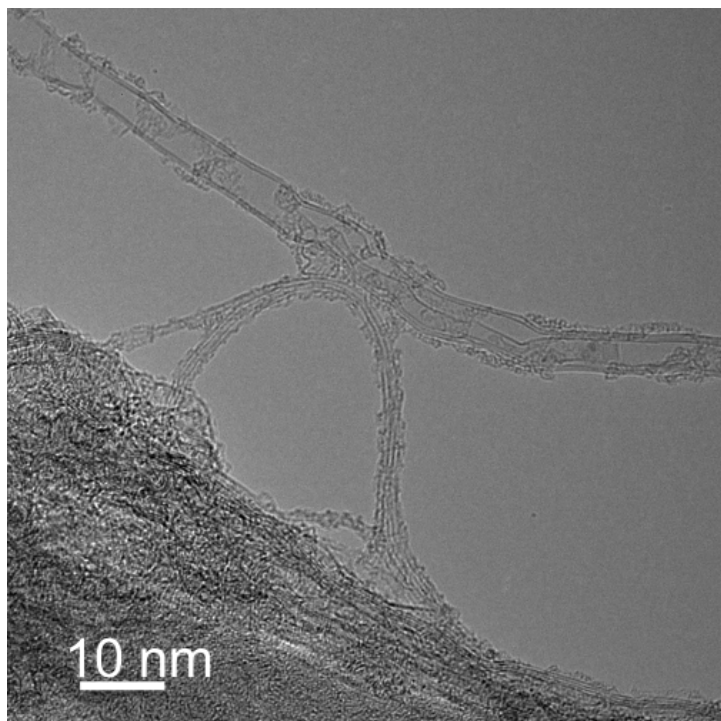

**Figure S4.** A typical TEM image of carbon nanotubes grown on  $\text{Co}_x\text{Mg}_{1-x}\text{O}(450)$  catalyst.

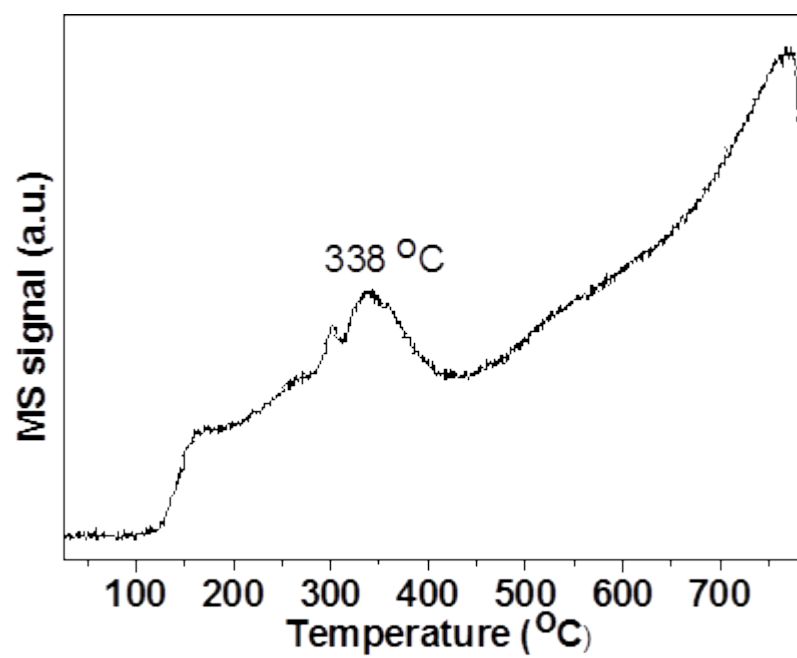

**Figure S5.** H<sub>2</sub>-TPR profile of the Co<sub>x</sub>Mg<sub>1-x</sub>O (600) catalyst.
